# Supplementary material for: The Link between the Perception of Animal Welfare and the Emotional Response to Pictures of Farm Animals Kept in Intensive and Extensive Husbandry Systems: An Italian Survey
Source: MDPI journal article supplement (doi:10.3390/vetsci10110652), 2023-11-13

**Figure S1.** "Human Emotions and Animal Farming" Questionnaire.

**Gender \***

- ☐ Male
- ☐ Female

**Age \***

- ☐ <25
- ☐ 25-40
- ☐ 40-55
- ☐ >55

**Education \***

- ☐ University
- ☐ Middle school
- ☐ High school
- ☐ Elementary school
- ☐ Post-graduate

**Living area \***

- ☐ City (above 30.000 citizens)
- ☐ Town (5000-30.000 citizens)
- ☐ Village (up to 5000 citizens)

**Profession \***

- ☐ Student
- ☐ Employee
- ☐ Workman
- ☐ Working with animals (veterinarian, breeder, etc.)
- ☐ Other:

**Household members \*** (including yourself)

- ☐ 1
- ☐ 2
- ☐ 3
- ☐ >3

**Do you have animals in your house? \***

- ☐ Yes
- ☐ No

**If not, please specify:**

- ☐ Never had
- ☐ In the past, but not currently

**For each of the following pictures:**

**Please, mark the intensity of each of the following emotions felt while watching at this picture, by using the corresponding scoring scale from 0 to 5, where 0=emotion not felt; 5= emotion felt at maximum intensity. \***

|                        | 0                     | 1                     | 2                     | 3                     | 4                     | 5                     |
|------------------------|-----------------------|-----------------------|-----------------------|-----------------------|-----------------------|-----------------------|
| Anger                  | <input type="radio"/> |
| Joy                    | <input type="radio"/> |
| Sadness                | <input type="radio"/> |
| Surprise               | <input type="radio"/> |
| Shame / Disappointment | <input type="radio"/> |
| Resignation            | <input type="radio"/> |
| Hope                   | <input type="radio"/> |
| Nostalgia              | <input type="radio"/> |
| Remorse / Guilt        | <input type="radio"/> |
| Contempt / Disgust     | <input type="radio"/> |

**In your opinion, what is the level of animal welfare? \***

- ☐ Very poor
- ☐ Poor
- ☐ Good
- ☐ Excellent
- ☐ Don't know

**Photo 1**

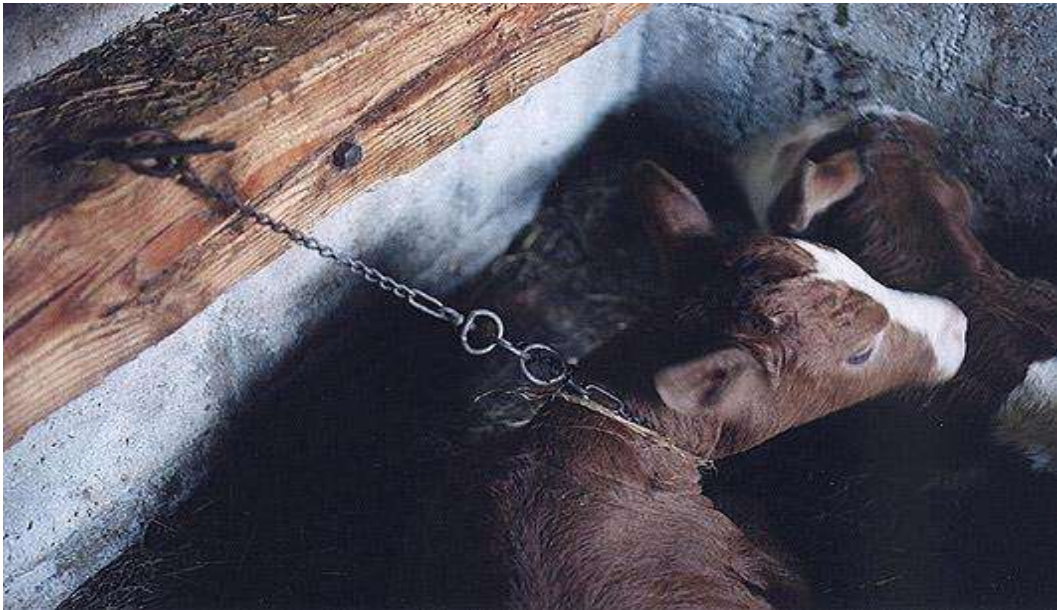

**Photo 2**

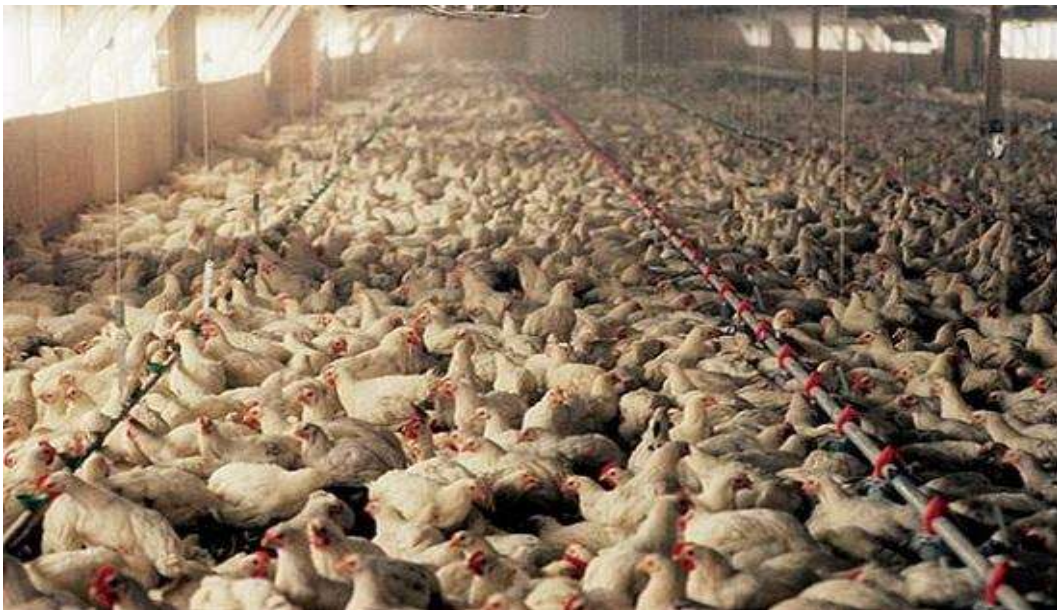

**Photo 3**



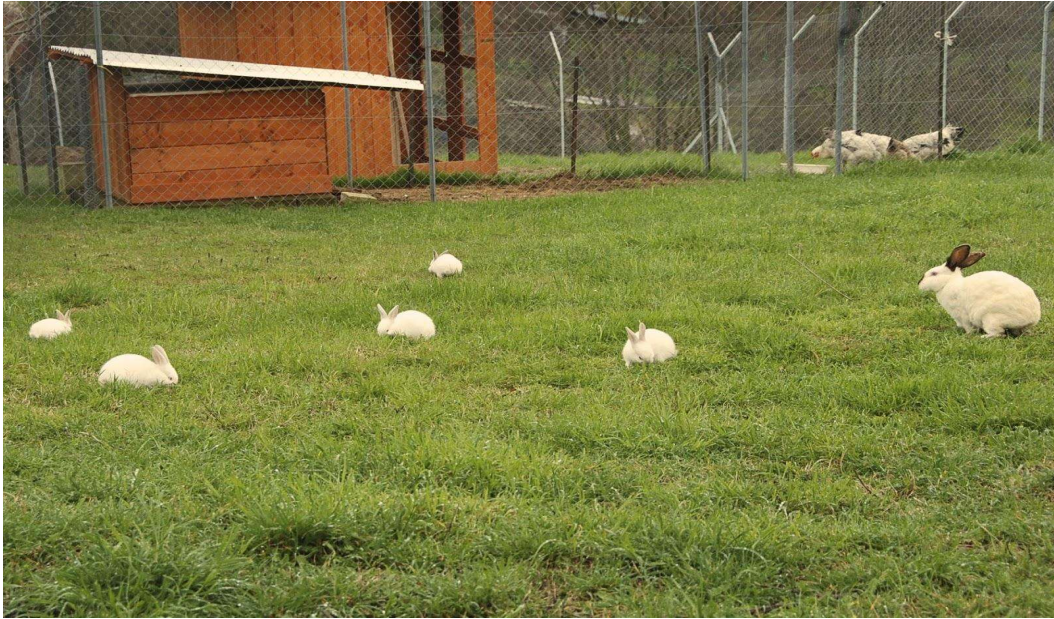

**Photo 4**

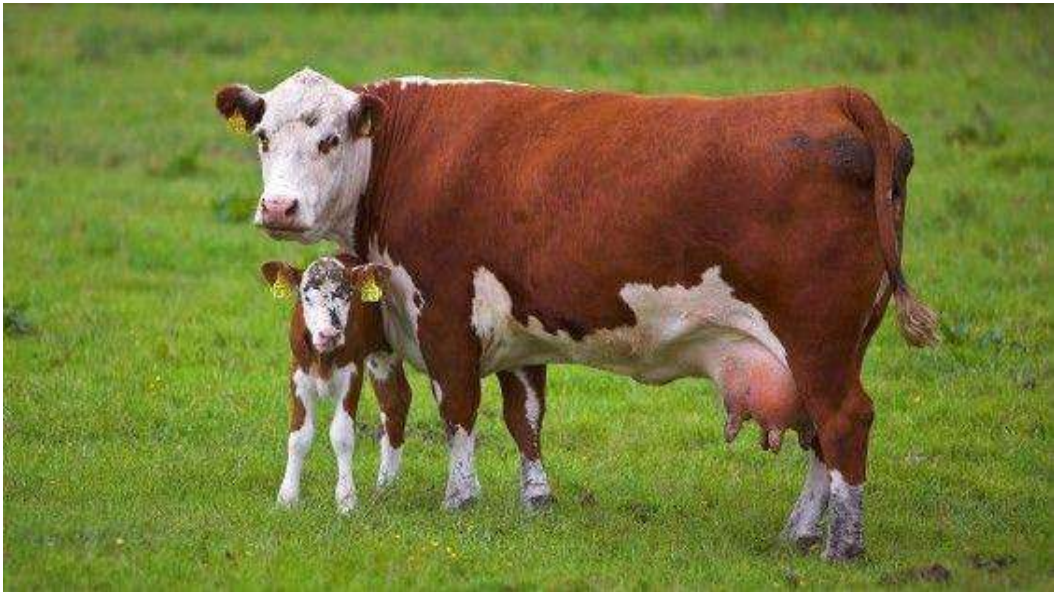

**Photo 5**



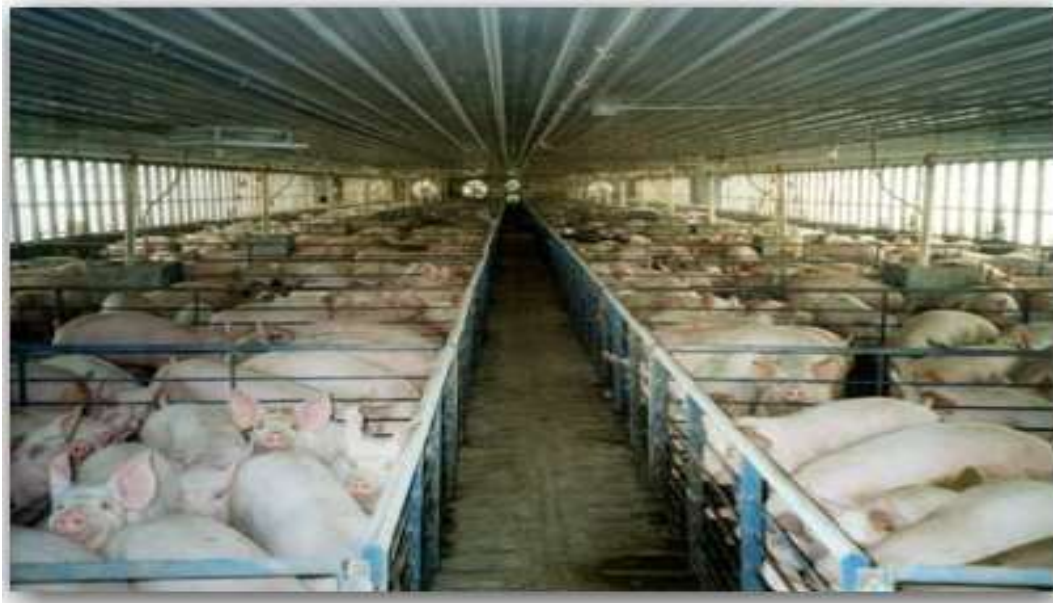

**Photo 6**

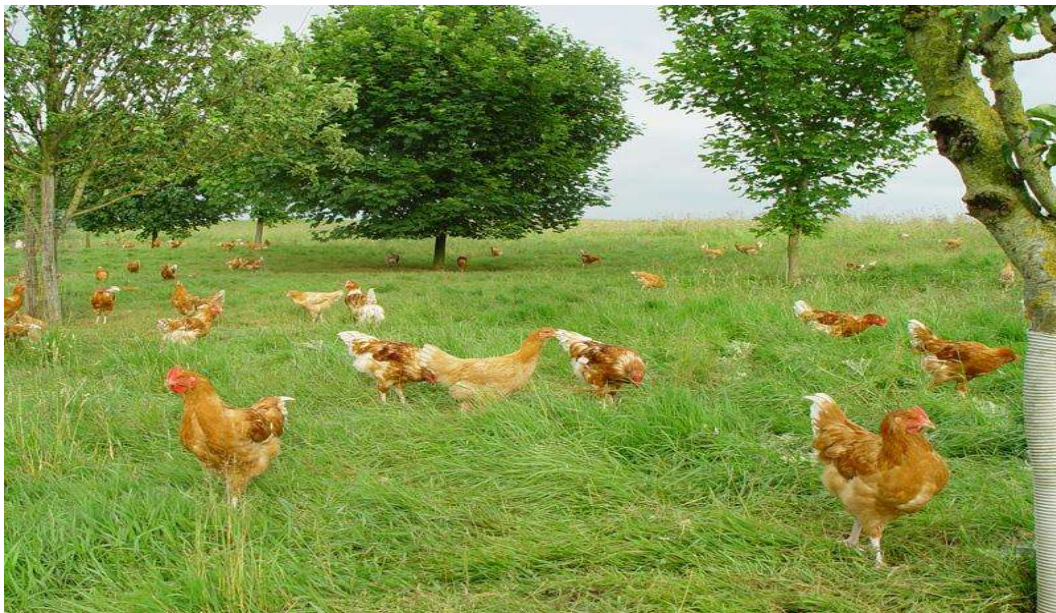

**Photo 7**

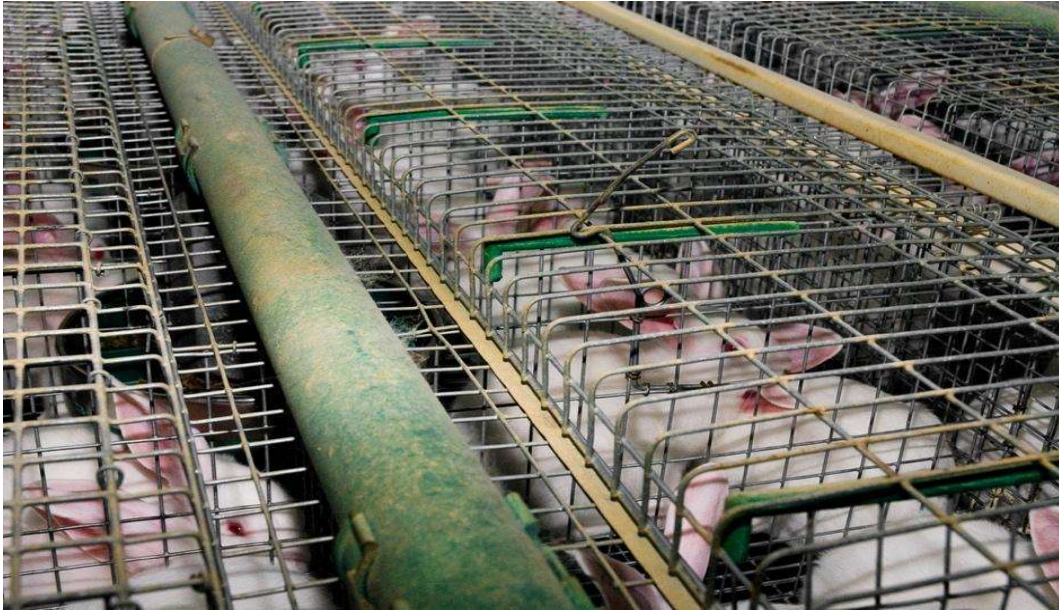

**Photo 8**

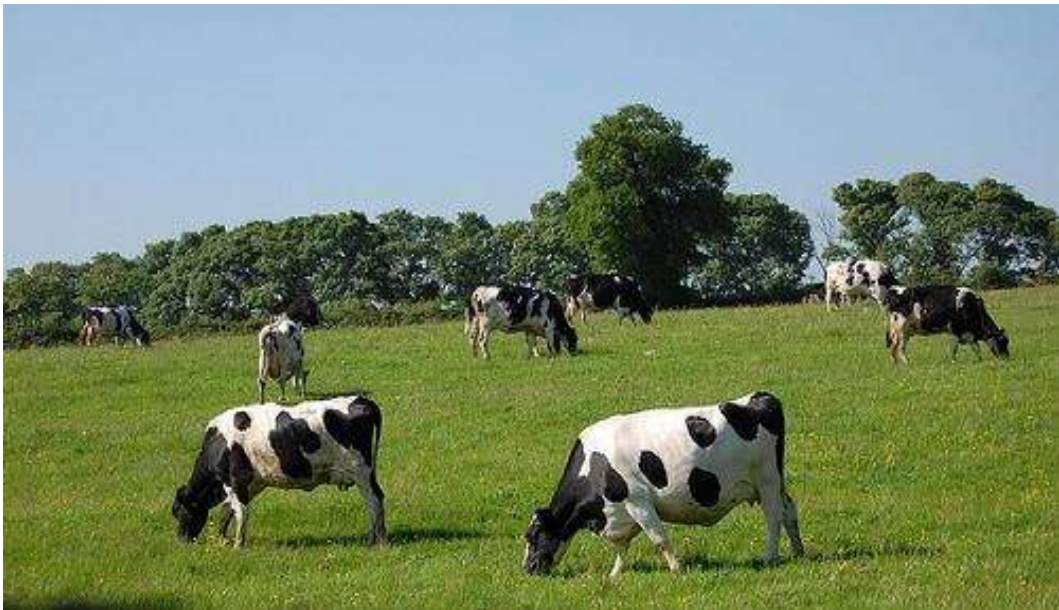

**Photo 9**



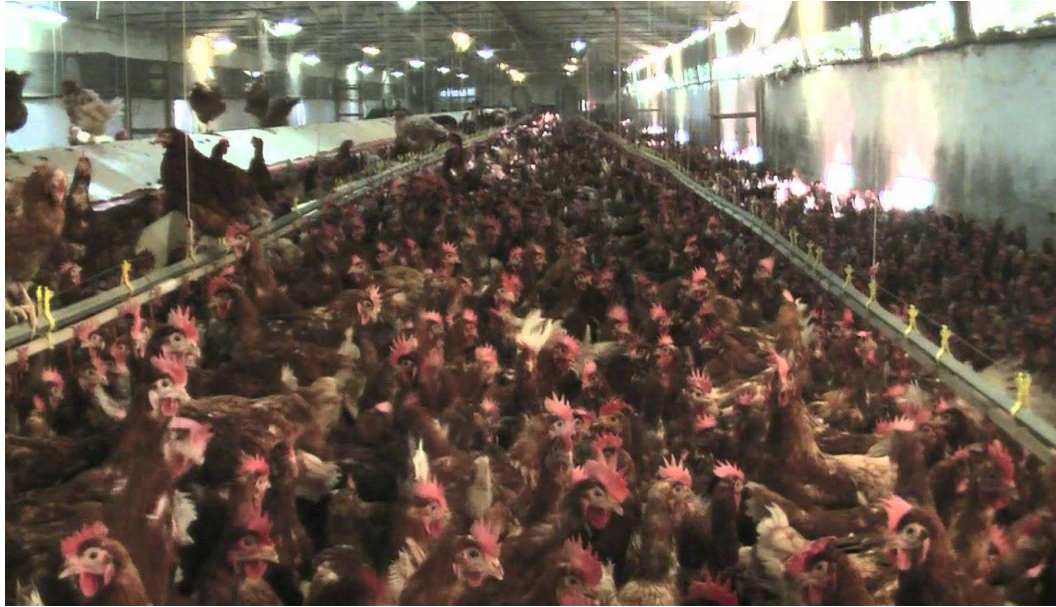

**Photo 10**

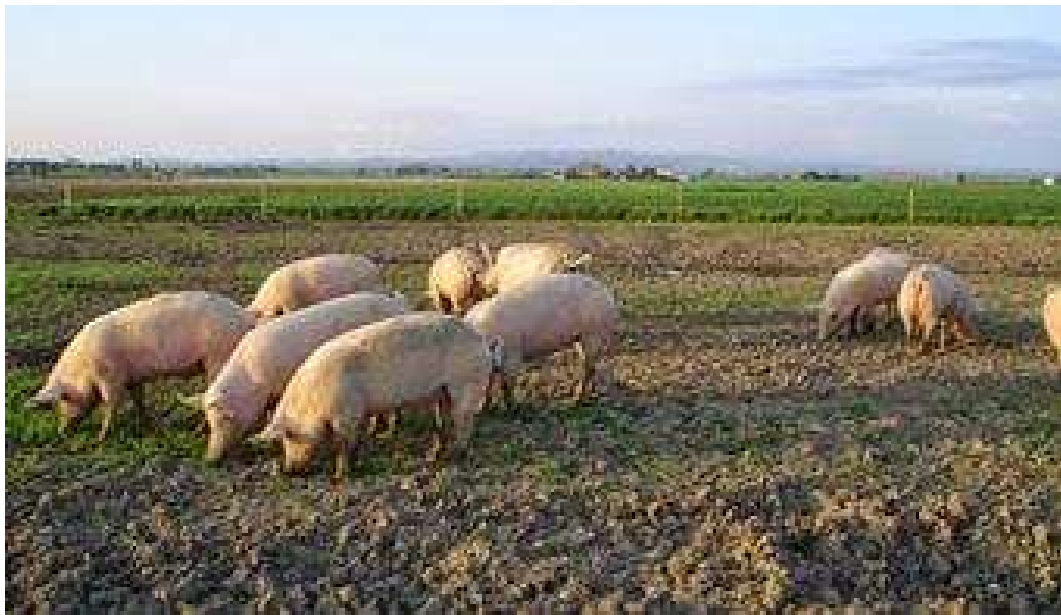

**Photo 11**

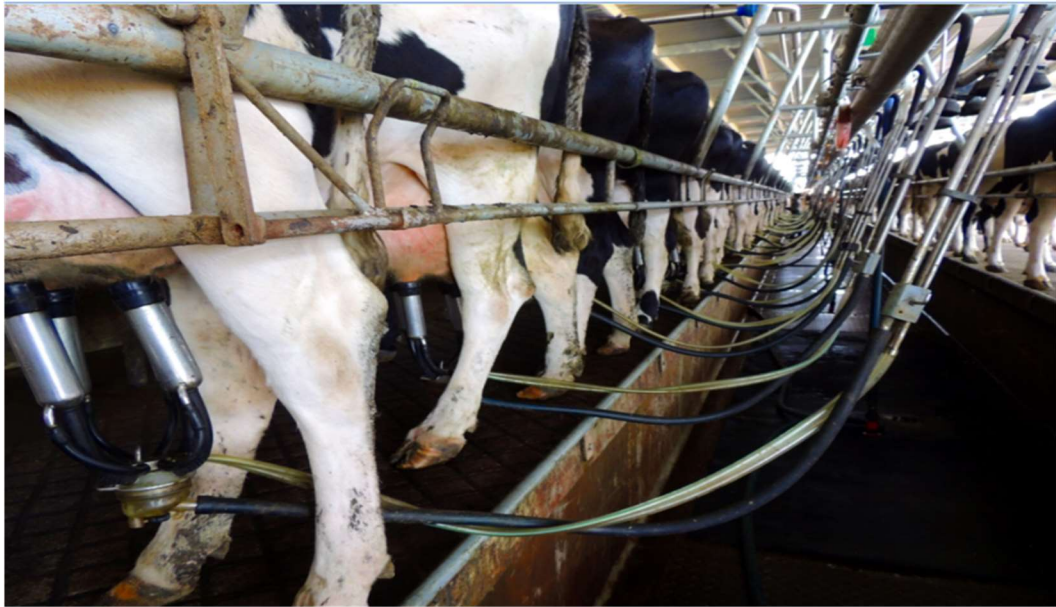

**When you purchase animal products, how important is to you that the animals have been bred with good welfare standards? \***

- ☐ Not important at all
- ☐ Of little importance
- ☐ Moderately important
- ☐ Important
- ☐ Very important
- ☐ Other:

**How many times a week do you eat the following animal products? \***

|              | Never                 | Up to 2 times a week  | Up to 4 times a week  | Everyday              |
|--------------|-----------------------|-----------------------|-----------------------|-----------------------|
| Beef         | <input type="radio"/> | <input type="radio"/> | <input type="radio"/> | <input type="radio"/> |
| Chicken meat | <input type="radio"/> | <input type="radio"/> | <input type="radio"/> | <input type="radio"/> |
| Rabbit meat  | <input type="radio"/> | <input type="radio"/> | <input type="radio"/> | <input type="radio"/> |
| Pork meat    | <input type="radio"/> | <input type="radio"/> | <input type="radio"/> | <input type="radio"/> |
| Eggs         | <input type="radio"/> | <input type="radio"/> | <input type="radio"/> | <input type="radio"/> |
| Milk         | <input type="radio"/> | <input type="radio"/> | <input type="radio"/> | <input type="radio"/> |



**Are you vegetarian or vegan? \***

- ☐ Yes
- ☐ No

**If you are, please indicate the reason beyond your choice:**

- ☐ Ethical reasons
- ☐ I do not like meat
- ☐ Health reasons
- ☐ Other:

**Thank you so much for your precious contribution!**

**Table S1.** Participants demographic data and eating habits.

|                              |                                            | Number | Percentage<br>of<br>respondents | P value <sup>#</sup> |
|------------------------------|--------------------------------------------|--------|---------------------------------|----------------------|
| <b>Gender</b>                | <b>Female</b>                              | 479    | 57.4%                           | <0.001               |
|                              | <b>Male</b>                                | 356    | 42.6%                           |                      |
| <b>Age</b>                   | <b>&lt;25 years</b>                        | 240    | 28.7%                           | 0.007                |
|                              | <b>25-40 years</b>                         | 216    | 25.9%                           |                      |
|                              | <b>40-55 years</b>                         | 170    | 20.4%                           |                      |
|                              | <b>&gt;55 years</b>                        | 209    | 25.0%                           |                      |
| <b>Study</b>                 | <b>Primary</b>                             | 145    | 17.4%                           | <0.001               |
|                              | <b>Middle</b>                              | 103    | 12.3%                           |                      |
|                              | <b>High school</b>                         | 360    | 43.1%                           |                      |
|                              | <b>University degree</b>                   | 149    | 17.8%                           |                      |
|                              | <b>Postgraduate</b>                        | 78     | 9.3%                            |                      |
| <b>Residence</b>             | <b>Village (up to 5000 inhabitants)</b>    | 378    | 45.3%                           | <0.001               |
|                              | <b>Small town (5000-30000 inhabitants)</b> | 317    | 38.0%                           |                      |
|                              | <b>City (over 30000 inhabitants)</b>       | 140    | 16.8%                           |                      |
| <b>Job</b>                   | <b>Student</b>                             | 237    | 39.4%                           | <0.001               |
|                              | <b>Employe</b>                             | 165    | 27.4%                           |                      |
|                              | <b>Artisan</b>                             | 59     | 9.8%                            |                      |
|                              | <b>Worked somehow with animals</b>         | 57     | 9.5%                            |                      |
|                              | <b>Housewives</b>                          | 5      | 0.8%                            |                      |
|                              | <b>Freelancers/entrepreneurs</b>           | 21     | 3.5%                            |                      |
|                              | <b>Teachers/professors</b>                 | 13     | 2.2%                            |                      |
|                              | <b>Unemployed</b>                          | 13     | 2.2%                            |                      |
|                              | <b>Retired</b>                             | 28     | 4.7%                            |                      |
|                              | <b>Other</b>                               | 4      | 0.7%                            |                      |
| <b>Family structure</b>      | <b>1 member</b>                            | 146    | 17.5%                           | <0.001               |
|                              | <b>2 members</b>                           | 205    | 24.6%                           |                      |
|                              | <b>&gt;2 members</b>                       | 484    | 58.0%                           |                      |
| <b>Animal at home</b>        | <b>Yes</b>                                 | 639    | 76.5%                           | <0.001               |
|                              | <b>No</b>                                  | 196    | 23.5%                           |                      |
| <b>Animals in the past *</b> | <b>Never owned</b>                         | 24     | 19.2%                           | <0.001               |
|                              | <b>Owned in the past</b>                   | 101    | 80.8%                           |                      |
| <b>Vegetarian/vegan</b>      | <b>Yes</b>                                 | 766    | 91.7%                           | <0.001               |
|                              | <b>No</b>                                  | 69     | 8.3%                            |                      |

<sup>#</sup> estimated by Chi-Square Goodness-of Fit tests. \* Only for respondents who said they did not own animals at home



**Figure S2.** *PC Emotion* scores (means  $\pm$  95% CI) in intensive and extensive farms. *PC Emotion* represents a sadness-joy axis where positive scores indicate joy and hope while negative scores indicate anger, sadness, remorse/guilt, resignation, contempt/disgust and shame/disappointment.

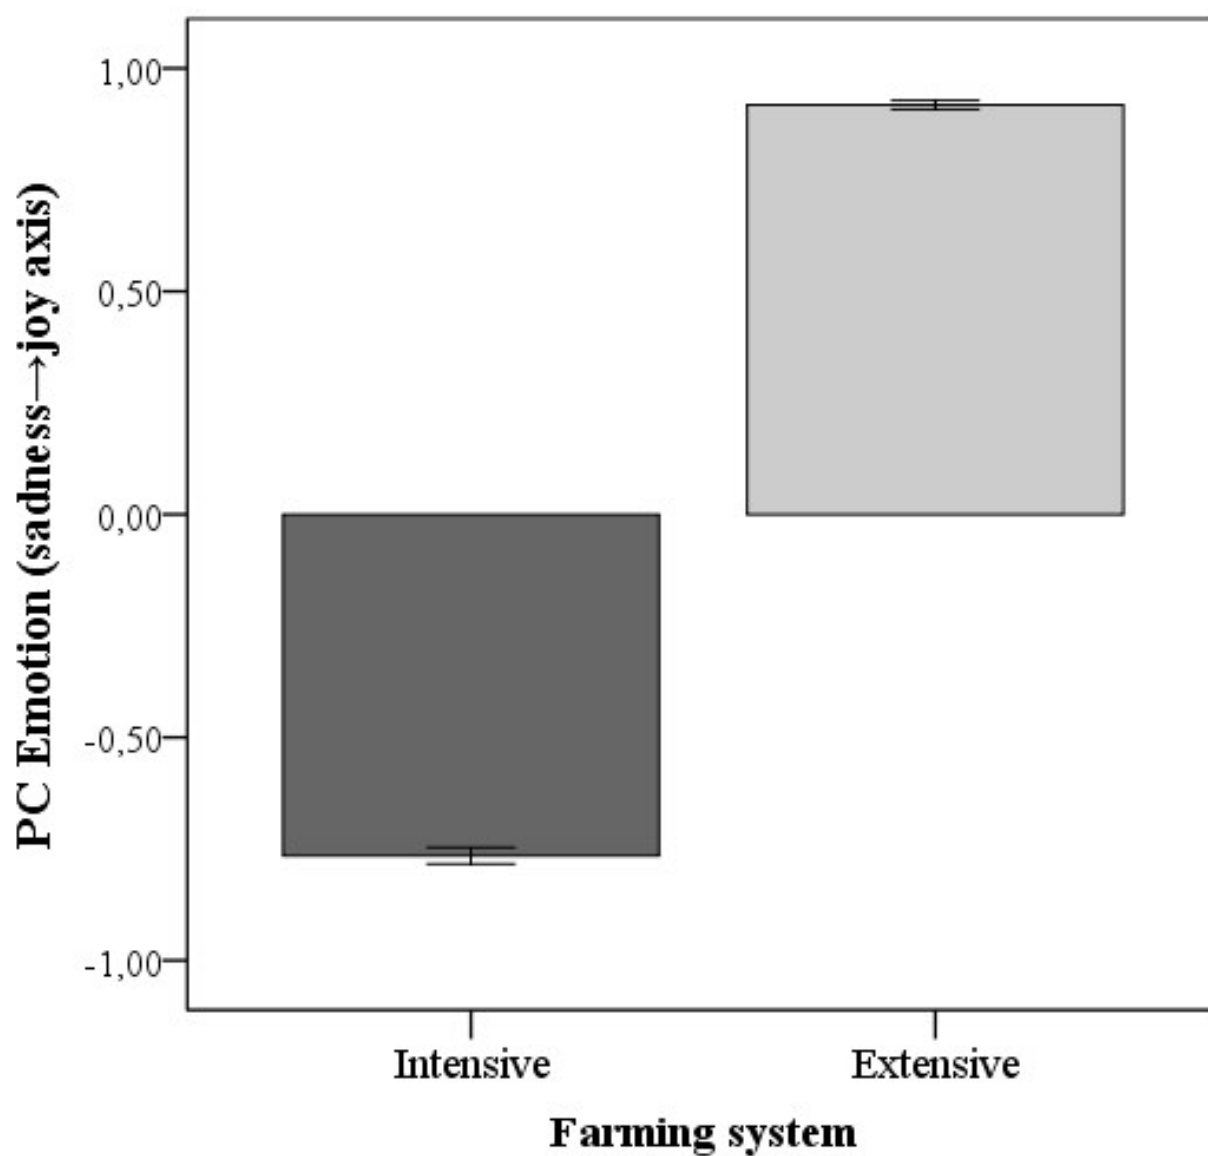

**Figure S3.** Association between perception of animal welfare conditions and score of *PC Emotion* in each picture according to the farming system.

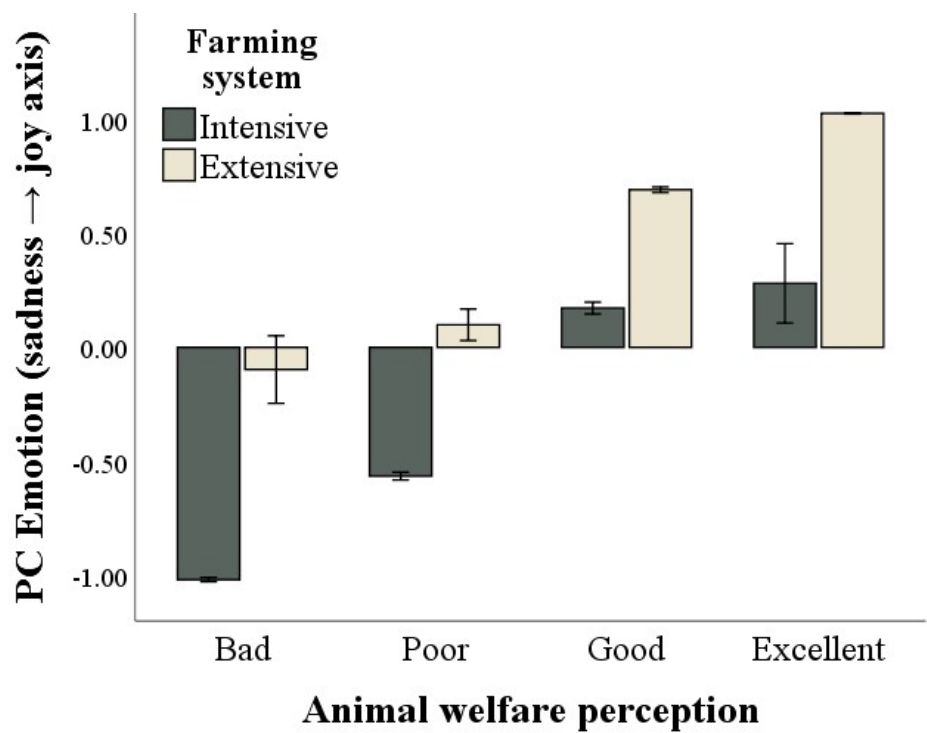

Supplement: s1 [file s1]
